# Supplementary material for: Genome-Wide Identification of the YABBY Gene Family in Seven Species of Magnoliids and Expression Analysis in Litsea
Source: Plants (Basel). 2020 Dec 24;10(1):21. doi: 10.3390/plants10010021 (PMC7824534; doi:10.3390/plants10010021)
Supplement: Supplementary file 1 [file plants-10-00021-s001.xlsx]

## Sheet: Sheet1
Supplementary Table S1. Gene accession list of YABBY genes from different plants in phylogenetic tree.
Family	Species	Clade	Gene accession	gene name
Rosaceae	Malus domestica	CRC/DL	XP_017192417.1	MdCRC
Liliaceae	Abrus precatorius	INO	XP_027361580	ApINO
Actinidiaceae	Actinidia chinensis var. chinensis	INO	PSS26874	AcINO
Amborellaceae	Amborella trichopoda	CRC/DL/DL	NP_001292759.1	AmtCRC
Amborellaceae	Amborella trichopoda	FIL	BAD72170.1	AmtFIL
Amborellaceae	Amborella trichopoda	INO	XP_006840679	AmtINO
Amborellaceae	Amborella trichopoda	YAB2	XP_011622458.1	AmtYAB2
Amborellaceae	Amborella trichopoda	YAB2	BAD72168.1	AmtYAB2
Amborellaceae	Amborella trichopoda	YAB2	BAD72168.1	AmtYAB2
Amborellaceae	Amborella trichopoda	FIL	XP_006840962.3	AmtYAB4
Amborellaceae	Amborella trichopoda	YAB5	NP_001292760.1	AmtYAB5
Bromeliaceae	Ananas comosus	CRC/DL/DL	OAY84162.1	AcDL
Bromeliaceae	Ananas comosus	YAB2	XP_020095287	AcYAB4
Bromeliaceae	Ananas comosus	CRC/DL/DL	XP_020105063	AcYAB7
Annonaceae	Annona cherimola	INO	ADY39267.1	AchINO
Annonaceae	Annona squamosa	INO	ADY39186.1	AsqINO
Plantaginaceae	Antirrhinum majus	CRC/DL/DL	AAS10180	AmCRC
Plantaginaceae	Antirrhinum majus	INO	AAS10181	AmINO
Plantaginaceae	Antirrhinum majus	YAB2	AAS10179	AmYAB2
Orchidaceae	Apostasia shenzhenica	INO	Isolate in this study	AshINO
Brassicaceae	Arabidopsis thaliana	INO	NP_564194.1	AtINO
Liliaceae	Asparagus officinalis	INO	XP_020263790	AoINO
Liliaceae	Asparagus officinalis	YAB2	XP_020255937	AoYAB2
Brassicaceae	Boechera stricta	INO	Bostr.12659s0203.1	BsINO
Brassicaceae	Boechera stricta	YAB2	Bostr.25219s0098.1	BsYAB2
Nymphaeaceae	Brasenia schreberi	FIL	BAF65256.1	BsFIL
Brassicaceae	Brassica oleracea	INO	AFX60091.1	BoINO
Brassicaceae	Brassica rapa	YAB2	XP_009148101	BrYAB2
Brassicaceae	Brassica rapa	YAB5	XP_009133936.1	BrYAB5
Cabombaceae	Cabomba caroliniana	CRC/DL/DL	BAJ83622.1	CcCRC
Cabombaceae	Cabomba caroliniana	FIL	BAJ83620.1	CcFIL
Cabombaceae	Cabomba caroliniana	INO	BAJ83621.1	CcINO
Cabombaceae	Cabomba caroliniana	YAB2	BAJ83623.1	CcYAB2
Cabombaceae	Cabomba caroliniana	YAB5	BAD72169.1	CcYAB5
Cabombaceae	Cabomba caroliniana	YAB5	BAJ83624.1	CcYAB5.1
Leguminosae	Cajanus cajan	CRC/DL	XP_020210956.1	CajCRC
Leguminosae	Cajanus cajan	INO	XP_020216177.2	CajYAB4
Brassicaceae	Camelina sativa	YAB5	XP_010510888.1	CasYAB5
Brassicaceae	Camelina sativa	YAB5	XP_030510482.1	CsYAB5
Theaceae	Camellia sinensis	INO	XP_028115851.1	CsYAB4
Brassicaceae	Capsella rubella	YAB5	XP_006295133.1	CrYAB5
Solanaceae	Capsicum chacoense	INO	AWQ60036.1	CaINO
Solanaceae	Capsicum chinense	YAB2	PHU11413.1	CacYAB2
Caricaceae	Carica papaya	CRC/DL	XP_021911665.1	CpaCRC
Caricaceae	Carica papaya	YAB5	XP_021895056.1	CpaYAB5
Fagaceae	Castanea sativa	CRC/DL	ABW75656.1	CsCRC
Fagaceae	Castanopsis carlesii	CRC/DL	ABW75662.1	CacCRC
Fagaceae	Castanopsis fissa	CRC/DL	ABW75667.1	CafCRC
Calycanthaceae	Chimonanthus praecox	CRC/DL	Isolate in this study	ChpCRC
Calycanthaceae	Chimonanthus praecox	FIL	Isolate in this study	ChpFIL
Calycanthaceae	Chimonanthus praecox	YAB2	Isolate in this study	ChpYAB2
Calycanthaceae	Chimonanthus praecox	YAB5	Isolate in this study	ChpYAB5.1
Calycanthaceae	Chimonanthus praecox	YAB5	Isolate in this study	ChpYAB5.2
Calycanthaceae	Chimonanthus salicifolius	CRC/DL	Isolate in this study	ChsCRC
Calycanthaceae	Chimonanthus salicifolius	FIL	Isolate in this study	ChsFIL
Calycanthaceae	Chimonanthus salicifolius	YAB2	Isolate in this study	ChsYAB2
Calycanthaceae	Chimonanthus salicifolius	INO	Isolate in this study	ChsYAB4
Calycanthaceae	Chimonanthus salicifolius	YAB5	Isolate in this study	ChsYAB5.1
Calycanthaceae	Chimonanthus salicifolius	YAB5	Isolate in this study	ChsYAB5.2
Lauraceae	Cinnamomum micranthum f. kanehirae	CRC/DL	Isolate in this study	CmCRC
Lauraceae	Cinnamomum micranthum f. kanehirae	INO	Isolate in this study	CmINO
Lauraceae	Cinnamomum micranthum f. kanehirae	FIL	Isolate in this study	CmYAB1
Lauraceae	Cinnamomum micranthum f. kanehirae	YAB2	Isolate in this study	CmYAB2
Lauraceae	Cinnamomum micranthum f. kanehirae	FIL	Isolate in this study	CmYAB4
Lauraceae	Cinnamomum micranthum f. kanehirae	YAB5	Isolate in this study	CmYAB5
Lauraceae	Cinnamomum micranthum f. kanehirae	YAB5	Isolate in this study	CmYAB5.1
Lauraceae	Cinnamomum micranthum f. kanehirae	YAB5	Isolate in this study	CmYAB5.2
Rutaceae	Citrus sinensis	CRC/DL	XP_006484236.1	CsCRC
Rutaceae	Citrus sinensis	YAB5	XP_006475868.1	CsYAB5
Rubiaceae	Coffea arabica	CRC/DL	XP_027096329.1	CofCRC
Rubiaceae	Coffea arabica	FIL	XP_027106482.1	CofYAB1
Rubiaceae	Coffea arabica	YAB2	XP_027082533.1	CofYAB2
Rubiaceae	Coffea arabica	INO	XP_027099769.1	CofYAB4
Rubiaceae	Coffea arabica	YAB5	XP_027069943.1	CofYAB5
Rubiaceae	Coffea eugenioides	YAB5	XP_027175450.1	CofYAB5
Cucurbitaceae	Cucumis sativus	YAB5	XP_004147586.1	CsYAB5
Bombacaceae	Durio zibethinus	FIL	XP_022732637.1	DzFIL
Malvaceae	Durio zibethinus	INO	XP_022775586	DzINO
Malvaceae	Durio zibethinus	YAB2	XP_022756051	DzYAB2
Arecaceae	Elaeis guineensis	INO	XP_029124405	EgINO
Arecaceae	Elaeis guineensis	YAB2	XP_029116808	EgYAB2
Musaceae	Ensete ventricosum	CRC/DL/DL	RRT32785	EvDL
Musaceae	Ensete ventricosum	INO	RWW15898	EvINO
Musaceae	Ensete ventricosum	YAB2	RZR73288	EvYAB2
Papaveraceae	Eschscholzia californica	CRC/DL/DL	CAQ17052.1	EcCRC
Myrtaceae	Eucalyptus grandis	YAB5	XP_010048072.1	EgYAB5
Pentapetalae	Eutrema salsugineum	YAB2	XP_00641768	EsYAB2
Pentapetalae	Eutrema salsugineum	YAB5	XP_024004272.1	EsYAB5
Myrtaceae	Fagus grandifolia	CRC/DL	ABW75751.1	FgCRC
Rosaceae	Fragaria vesca	INO	XP_011463139	FvINO
Rosaceae	Fragaria vesca subsp. Vesca	YAB5	XP_011458048.1	FvYAB5
Leguminosae	Glycine max	YAB2	NP_001344752	GmYAB11
Leguminosae	Glycine max	YAB5	NP_001344723.1	GmYAB5
Asteraceae	Helianthus annuus	YAB5	XP_021969003.1	HaYAB5
Euphorbiaceae	Hevea brasiliensis	YAB2	XP_021664753	HbYAB2
Malvaceae	Hibiscus syriacus	CRC/DL	KAE8730019.1	HsCRC
Magnoliaceae	Liriodendron chinense	FIL	Isolate in this study	LchiFIL
Magnoliaceae	Liriodendron chinense	INO	Isolate in this study	LchiINO
Magnoliaceae	Liriodendron chinense	YAB2	Isolate in this study	LchiYAB2
Magnoliaceae	Liriodendron chinense	FIL	Isolate in this study	LchiYAB3
Magnoliaceae	Liriodendron chinense	YAB5	Isolate in this study	LchiYAB5
Magnoliaceae	Liriodendron chinense	YAB5	Isolate in this study	LchiYAB5.1
Lauraceae	Litsea cubeba	CRC/DL	Isolate in this study	LcCRC
Lauraceae	Litsea cubeba	FIL	Isolate in this study	LcFIL
Lauraceae	Litsea cubeba	FIL	Isolate in this study	LcFIL.1
Lauraceae	Litsea cubeba	INO	Isolate in this study	LcINO
Lauraceae	Litsea cubeba	YAB2	Isolate in this study	LcYAB2
Lauraceae	Litsea cubeba	YAB5	Isolate in this study	LcYAB5
Lauraceae	Litsea cubeba	YAB5	Isolate in this study	LcYAB5.1
Lauraceae	Litsea cubeba	YAB5	Isolate in this study	LcYAB5.2
Magnoliaceae	Magnolia grandiflora	FIL	BAF65261.1	MgFIL
Rosaceae	Malus domestica	YAB2	NP_001280989	MdYAB2
Euphorbiaceae	Manihot esculenta	INO	XP_021633751.1	MeYAB4
Leguminosae	Medicago truncatula	YAB5	AES96167.1	MtYAB5
Cucurbitaceae	Momordica charantia	CRC/DL	XP_022149102.1	McCRC
Moraceae	Morus notabilis	YAB5	XP_010090516.1	MnYAB5
Musaceae	Musa acuminata subsp. malaccensis	YAB2	XP_018686402.1	MaYAB2
Musaceae	Musa acuminata subsp. malaccensis	INO	XP_009391978.1	MaYAB3
Nelumbonaceae	Nelumbo nucifera	YAB2	XP_01026307	NenYAB2
Nelumbonaceae	Nelumbo nucifera	INO	XP_010248516.1	NenYAB4
Solanaceae	Nicotiana sylvestris	YAB5	XP_009785258.1	NsYAB5
Solanaceae	Nicotiana tabacum	YAB2	XP_016461884	NtYAB2
Solanaceae	Nicotiana tomentosiformis	FIL	XP_009609785	NtYAB1.1
Solanaceae	Nicotiana tomentosiformis	FIL	XP_009600360	NtYAB1.2
Nymphaeaceae	Nuphar japonica	FIL	BAD83708.1	NjFIL
Nymphaeaceae	Nymphaea colorata	YAB5	XP_031483657.1	Nc YAB5
Nymphaeaceae	Nymphaea colorata	FIL	BAF65258.1	NcFIL
Nymphaeaceae	Nymphaea colorata	INO	XP_031477619	NcINO
Nymphaeaceae	Nymphaea colorata	YAB2	XP_031474595.1	NcYAB2
Nymphaeaceae	Nymphaea colorata	FIL	XP_031477620.1	NcYAB4
Papaveraceae	Papaver somniferum	YAB2	XP_02638677	PsYAB2
Orchidaceae	Phalaenopsis equestris	INO	XP_020589671	PeINO
Orchidaceae	Phalaenopsis equestris	YAB2	XP_020574278	PeYAB2
Orchidaceae	Phalaenopsis equestris	YAB2	XP_020596475	PeYAB3
Orchidaceae	Phalaenopsis equestris	YAB2	XP_020597453	PeYAB4
Lauraceae	Phoebe bournei	CRC/DL	Isolate in this study	PboCRC
Lauraceae	Phoebe bournei	FIL	Isolate in this study	PboFIL.1
Lauraceae	Phoebe bournei	FIL	Isolate in this study	PboFIL.2
Lauraceae	Phoebe bournei	YAB2	Isolate in this study	PboYAB2
Lauraceae	Phoebe bournei	YAB5	Isolate in this study	PboYAB5.1
Lauraceae	Phoebe bournei	YAB5	Isolate in this study	PboYAB5.2
Lauraceae	Phoebe bournei	YAB5	Isolate in this study	PboYAB5.3
Arecaceae	Phoenix dactylifera	YAB2	XP_008810627	PdYAB2
Arecaceae	Phoenix dactylifera	INO	XP_008812180.2	PdYAB7
Rosaceae	Physocarpus amurensis	CRC/DL	ABW75752.1	PhaCRC
Piperaceae	Piper nigrum	CRC/DL	Isolate in this study	PnCRC
Piperaceae	Piper nigrum	FIL	Isolate in this study	PnFIL.1
Piperaceae	Piper nigrum	FIL	Isolate in this study	PnFIL.2
Piperaceae	Piper nigrum	FIL	Isolate in this study	PnFIL.3
Piperaceae	Piper nigrum	INO	Isolate in this study	PnINO
Piperaceae	Piper nigrum	FIL	Isolate in this study	PnYAB1
Piperaceae	Piper nigrum	YAB2	Isolate in this study	PnYAB2
Piperaceae	Piper nigrum	YAB2	Isolate in this study	PnYAB2.1
Piperaceae	Piper nigrum	YAB5	Isolate in this study	PnYAB5.1
Piperaceae	Piper nigrum	YAB5	Isolate in this study	PnYAB5.2
Piperaceae	Piper nigrum	YAB5	Isolate in this study	PnYAB5.3
Piperaceae	Piper nigrum	YAB5	Isolate in this study	PnYAB5.4
Piperaceae	Piper nigrum	YAB5	Isolate in this study	PnYAB5.5
Piperaceae	Piper nigrum	YAB5	Isolate in this study	PnYAB5.6
Piperaceae	Piper nigrum	YAB5	Isolate in this study	PnYAB5.7
Anacardiaceae	Pistacia vera	YAB2	XP_03126420	PvYAB2
Anacardiaceae	Pistacia vera	YAB5	XP_031271923.1	PvYAB5
Salicaceae	Populus alba	CRC/DL	TKR74341.1	PaCRC
Salicaceae	Populus alba	FIL	XP_034905706.1	PalYAB1
Salicaceae	Populus alba	YAB5	XP_034918840.1	PalYAB5
Salicaceae	Populus alba	FIL	XP_034904507.1	PaYAB1
Salicaceae	Populus alba	YAB2	XP_034917281.1	PaYAB2
Salicaceae	Populus alba	FIL	XP_034888095.1	PaYAB4
Salicaceae	Populus alba	YAB5	XP_034918840.1	PaYAB5
Salicaceae	Populus euphratica	INO	XP_011045290	PeuINO.1
Salicaceae	Populus euphratica	INO	XP_011034119	PeuINO.2
Salicaceae	Populus trichocarpa	CRC/DL	XP_002311351.2	PtCRC
Salicaceae	Populus trichocarpa	INO	XP_024466434.1	PtINO
Salicaceae	Populus trichocarpa	YAB5	XP_002324648.2	PtYAB5
Rosaceae	Prunus avium	INO	XP_021809744	PaINO
Rosaceae	Prunus avium	YAB5	XP_021817715.1	PavYAB5
Rosaceae	Prunus dulcis	CRC/DL	VVA24152.1	PdCRC
Rosaceae	Prunus dulcis	YAB5	XP_034226365.1	PdYAB5
Rosaceae	Prunus incisa	INO	AKD43983.1	PiINO
Rosaceae	Prunus mume	CRC/DL/DL	XP_008243820	PmCRC
Rosaceae	Prunus mume	INO	XP_008221876	PmINO
Rosaceae	Prunus mume	INO	XP_008240911.1	PmINO
Rosaceae	Prunus mume	YAB2	XP_008230517	PmYAB2
Rosaceae	Prunus mume	YAB5	XP_008242786.1	PmYAB5
Rosaceae	Prunus persica	CRC/DL/DL	XP_007223999.2	PpCRC
Rosaceae	Prunus persica	INO	XP_007226582	PpINO
Rosaceae	Prunus persica	YAB2	XP_007207250	PpYAB2
Rosaceae	Prunus persica	YAB5	XP_007202630.1	PpYAB5
Rosaceae	Punica granatum	YAB5	XP_031380994.1	PgYAB5
Fagaceae	Quercus myrsinifolia	CRC/DL	ABW75727.1	QmCRC
Fagaceae	Quercus palustris	CRC/DL	ABW75729.1	QpCRC
Fagaceae	Quercus rugosa	CRC/DL	ABW75742.1	QrCRC
Fagaceae	Quercus suber	CRC/DL	ABW75743.1	QsCRC
Fagaceae	Quercus suber	YAB2	XP_023929543	QsYAB2
Fagaceae	Quercus suber	YAB5	XP_023893593.1	QsYAB5
Fagaceae	Quercus tomentella	CRC/DL	ABW75745.1	QtCRC
Euphorbiaceae	Raphanus sativus	FIL	XP_018476407	RaYAB1
Euphorbiaceae	Raphanus sativus	FIL	XP_018454386	RaYAB3
Euphorbiaceae	Raphanus sativus	YAB5	XP_018466118.1	RsYAB5
Apocynaceae	Rhodamnia argentea	INO	XP_030551934.1	RaYAB4
Apocynaceae	Rhodamnia argentea	YAB5	XP_030511324.1	RaYAB5
Euphorbiaceae	Ricinus communis	YAB5	EEF35214.1	RcoYAB5
Euphorbiaceae	Ricinus communis	INO	XP_025014264	RcYAB4
Euphorbiaceae	Ricinus communis	CRC/DL	XP_025015886.1	RicCRC
Rosaceae	Rosa chinensis	CRC/DL	XP_024191779.1	RcCRC
Rosaceae	Rosa chinensis	YAB5	XP_024161235.1	RcYAB5
Euphorbiaceae	Ruscus aculeatus	YAB2	BAF56419	RaYAB2
Solanaceae	Solanum lycopersicum	INO	AYV62367.1	SlINO
Solanaceae	Solanum lycopersicum	YAB2	XP_010322450.1	SlYAB2
Poaceae	Sorghum bicolor	YAB2	Sobic.002G039400.1	SbYAB1
Poaceae	Sorghum bicolor	YAB2	XP_021312905	SbYAB2
Poaceae	Sorghum bicolor	YAB2	Sobic.008G176300.1	SbYAB6
Poaceae	Sorghum bicolor	INO	Sobic.002G346800.1	SbYAB7
Fabaceae	Spatholobus suberectus	INO	TKY55120.1	SsINO
Fabaceae	Spatholobus suberectus	YAB5	TKY54843.1	SsYAB5
Cleomaceae	Tarenaya hassleriana	INO	XP_010533193	ThINO
Cleomaceae	Tarenaya hassleriana	YAB5	XP_010533151.1	ThYAB5
Sterculiaceae	Theobroma cacao	CRC/DL	Thecc1EG011484t1	TcCRC
Sterculiaceae	Theobroma cacao	FIL	XP_007052113.2	TcFIL
Sterculiaceae	Theobroma cacao	INO	EOY00530	TcINO
Sterculiaceae	Theobroma cacao	YAB2	Thecc1EG041175t1	TcYAB2
Sterculiaceae	Theobroma cacao	YAB2	Thecc1EG041175t2	TcYAB2.1
Sterculiaceae	Theobroma cacao	YAB5	Thecc1EG038105t1	TcYAB5
Celastraceae	Tripterygium wilfordii	CRC/DL	KAF5727141.1	TwCRC
Celastraceae	Tripterygium wilfordii	YAB5	KAF5749618.1	TwYAB5
Poaceae	Triticum aestivum	INO	SPT17272	TaINO
Leguminosae	Vigna radiata var. radiata	INO	XP_014520420.1	VrYAB4
Vitaceae	Vitis vinifera	FIL	RVX15701.1	VvYAB1
Vitaceae	Vitis vinifera	FIL	GSVIVT01001269001	VvYAB1.1
Vitaceae	Vitis vinifera	YAB2	RVX10928.1	VvYAB2
Vitaceae	Vitis vinifera	YAB2	GSVIVT01037533001	VvYAB2
Vitaceae	Vitis vinifera	FIL	RVX04274.1	VvYAB4
